# Supplementary material
Source: PubMed Central journal article supplement (PMC5679237)
Supplement: NIHMS899831-supplement-1.pdf [file NIHMS899831-supplement-1.pdf]

## Supplemental Figure 1, Clay et al.

### A. *L. major* Friedlin - C57BL/6

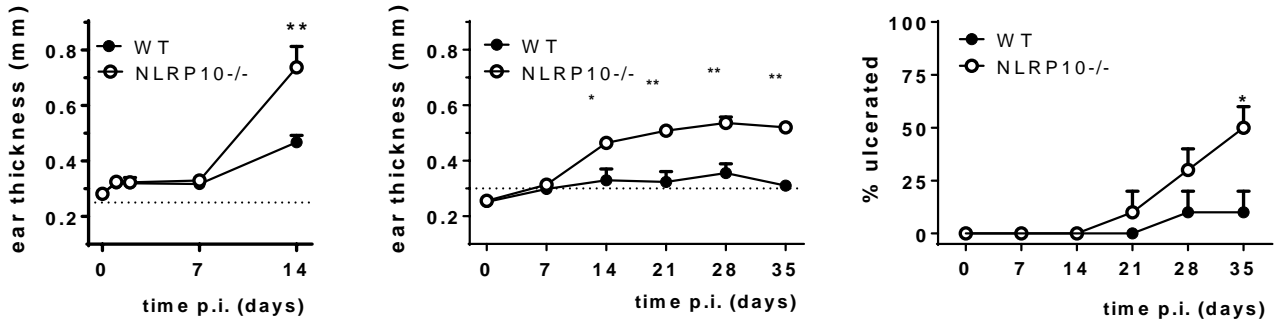

### B. *L. major* Friedlin - BALB/c

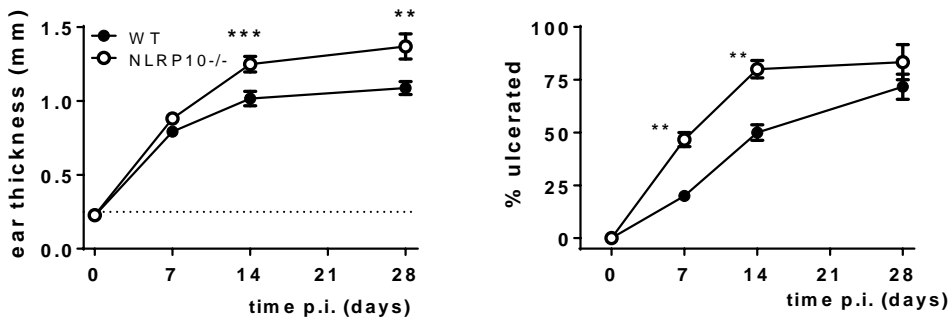

**Supplemental figure 1: Enlarged lesions are observed in NLRP10<sup>-/-</sup> mice on either a C57BL/6 or BALB/c background during infection with Friedlin strain *L. major*.** Mice were inoculated with  $5 \times 10^5$  WT *L. major* Friedlin strain metacyclic promastigotes intradermally in the ear pinna. Shown are the lesion size and proportion of mice with ulcerated lesions. Data in panel A were derived from both short- and long-term infection experiments, shown in different panels. A) WT or NLRP10<sup>-/-</sup> mice on a C57BL/6 background. B) WT or NLRP10<sup>-/-</sup> mice on a BALB/c background. Data show results (mean  $\pm$  standard error) of  $n = 3$  separate experiments, each performed with a minimum of five mice per group. Asterisks indicate significance (\*  $p < .05$ ; \*\*  $p < .01$ , \*\*\*  $p < 0.001$ ).
